# Supplementary material for: Synthesis, X-ray Diffraction, Thermogravimetric and DFT Analyses of Pyrimidine Derivatives
Source: PubMed Central journal article supplement (PMC6271542; doi:10.3390/molecules191117187), 2014-10-24
Supplement: molecules-19-17187-s001.pdf [file molecules-19-17187-s001.pdf]

# Supplementary Materials

**Figure S1.** DFT optimized structure of **1a** along with computed data.

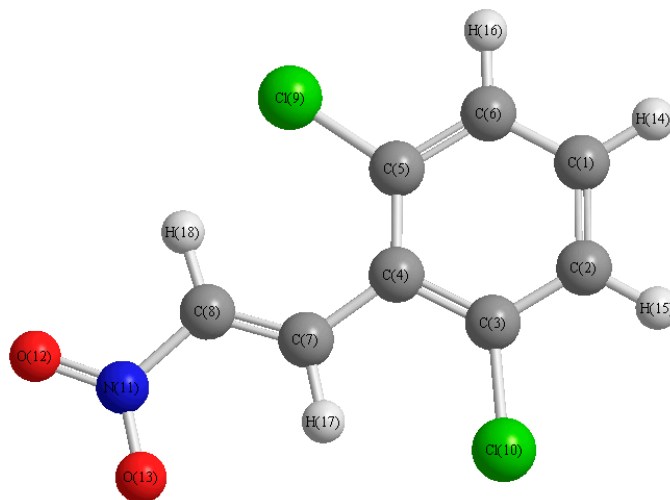

Heat of Formation = 22.075 kcal/mol; Total Energy = -896424.2164 kcal/mol; Zero point energy = 73.289560 kcal/mol; Dipole = (8.061982, -1.892683, -0.000283) 8.281171 Debye.

**Table S1.** Experimental bond lengths, angles for **1a**.

| Atom   | Bond Atom | Bond Length | Angle Atom | Angle    | Second Angle Atom | Second Angle | Second Angle Type |
|--------|-----------|-------------|------------|----------|-------------------|--------------|-------------------|
| C(1)   |           |             |            |          |                   |              |                   |
| C(2)   | C(1)      | 1.3852      |            |          |                   |              |                   |
| C(3)   | C(2)      | 1.4046      | C(1)       | 120.4992 |                   |              |                   |
| C(4)   | C(3)      | 1.4243      | C(2)       | 122.2381 | C(1)              | 0.0008       | Dihedral          |
| C(5)   | C(4)      | 1.4163      | C(3)       | 115.5409 | C(2)              | 0.0015       | Dihedral          |
| C(6)   | C(1)      | 1.3872      | C(2)       | 118.9898 | C(3)              | -0.0015      | Dihedral          |
| C(7)   | C(4)      | 1.4983      | C(3)       | 118.5863 | C(5)              | 125.8729     | Pro-S             |
| Cl(9)  | C(5)      | 1.7314      | C(4)       | 124.7209 | C(6)              | 113.6358     | Pro-S             |
| Cl(10) | C(3)      | 1.7405      | C(2)       | 114.3525 | C(4)              | 123.4094     | Pro-S             |
| C(8)   | C(7)      | 1.3415      | C(4)       | 130.2898 | C(3)              | 179.9749     | Dihedral          |
| N(11)  | C(8)      | 1.4511      | C(7)       | 119.8515 | C(4)              | -179.9972    | Dihedral          |
| O(12)  | N(11)     | 1.2370      | C(8)       | 115.6492 | C(7)              | -179.9878    | Dihedral          |
| O(13)  | N(11)     | 1.2372      | C(8)       | 119.2397 | O(12)             | 125.1111     | Pro-R             |
| H(14)  | C(1)      | 1.0871      | C(2)       | 120.5074 | C(6)              | 120.5028     | Pro-S             |
| H(15)  | C(2)      | 1.0886      | C(1)       | 119.1681 | C(3)              | 120.3327     | Pro-R             |
| H(16)  | C(6)      | 1.0893      | C(1)       | 118.7108 | C(5)              | 120.2005     | Pro-S             |
| H(17)  | C(7)      | 1.0888      | C(4)       | 113.6643 | C(8)              | 116.0459     | Pro-R             |
| H(18)  | C(8)      | 1.0736      | C(7)       | 130.8355 | N(11)             | 109.3130     | Pro-R             |

**Table S2.** Experimental transmittance and wavenumber for **1a**.

| <b>Transmittance (%)</b> | <b>Wavenumbers</b> |
|--------------------------|--------------------|
| 99.44                    | 0.6000             |
| 99.74                    | 1.4300             |
| 99.88                    | 4.4100             |
| 100.00                   | 4.8000             |
| 99.99                    | 10.0100            |
| 99.46                    | 20.7500            |
| 100.00                   | 37.4400            |
| 99.94                    | 49.8700            |
| 99.18                    | 88.0900            |
| 99.78                    | 106.0700           |
| 98.21                    | 128.8600           |
| 100.00                   | 171.9700           |
| 99.26                    | 204.2400           |
| 98.87                    | 253.9600           |
| 99.86                    | 271.8500           |
| 92.67                    | 298.1400           |
| 98.62                    | 389.3600           |
| 99.98                    | 411.4600           |
| 94.80                    | 462.5300           |
| 95.62                    | 471.1100           |
| 100.00                   | 537.2400           |
| 99.82                    | 566.3500           |
| 87.17                    | 638.7700           |
| 81.08                    | 661.5000           |
| 91.94                    | 705.7100           |
| 77.88                    | 755.1200           |
| 96.00                    | 762.7600           |
| 85.07                    | 827.6000           |
| 97.71                    | 908.2200           |
| 27.50                    | 915.9300           |
| 99.79                    | 928.6700           |
| 80.72                    | 995.1100           |
| 94.82                    | 1009.9600          |
| 87.32                    | 1021.9700          |
| 79.77                    | 1099.3700          |
| 76.02                    | 1134.6000          |
| 60.19                    | 1159.4100          |
| 67.77                    | 1190.9300          |
| 98.92                    | 1193.5300          |
| 92.30                    | 1289.2700          |
| 84.15                    | 1346.0800          |
| 97.32                    | 1375.0300          |
| 94.42                    | 1510.1600          |
| 98.40                    | 1581.9800          |
| 61.84                    | 1600.1900          |
| 99.19                    | 1753.4900          |
| 95.53                    | 1776.2100          |
| 96.54                    | 1844.8300          |
| 0.00                     | 1897.0300          |
| 99.73                    | 2914.3700          |
| 96.48                    | 2965.9200          |
| 99.79                    | 3039.6100          |
| 98.50                    | 3051.9200          |
| 98.85                    | 3068.2100          |

**Figure S2.** DFT calculated HOMO and LUMO for **1a**.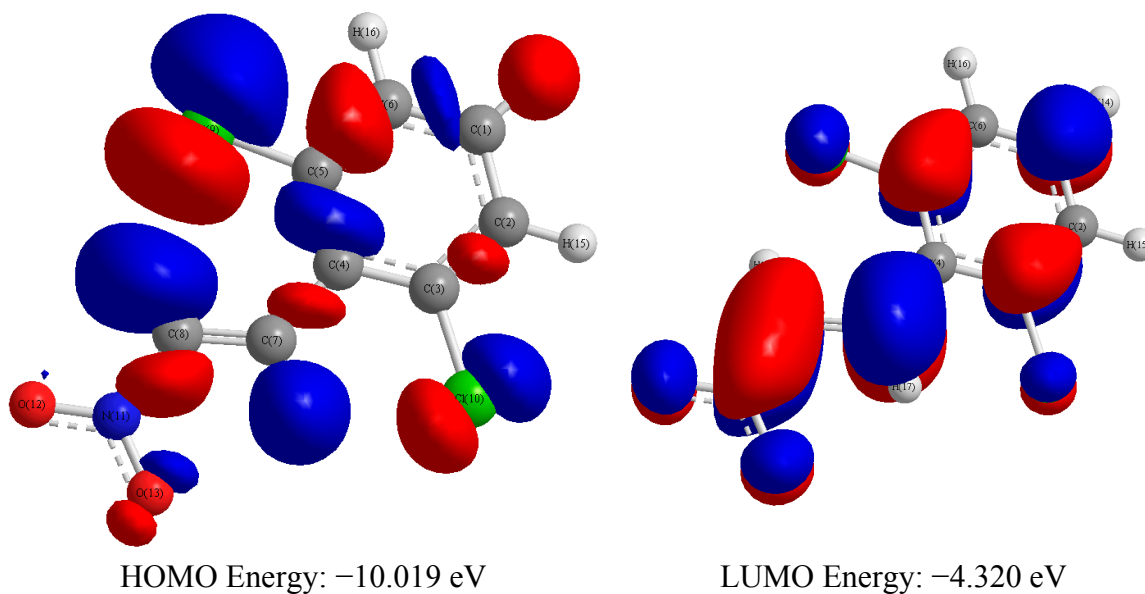**Figure S3.** DFT optimized structure of **2a** along with computed data.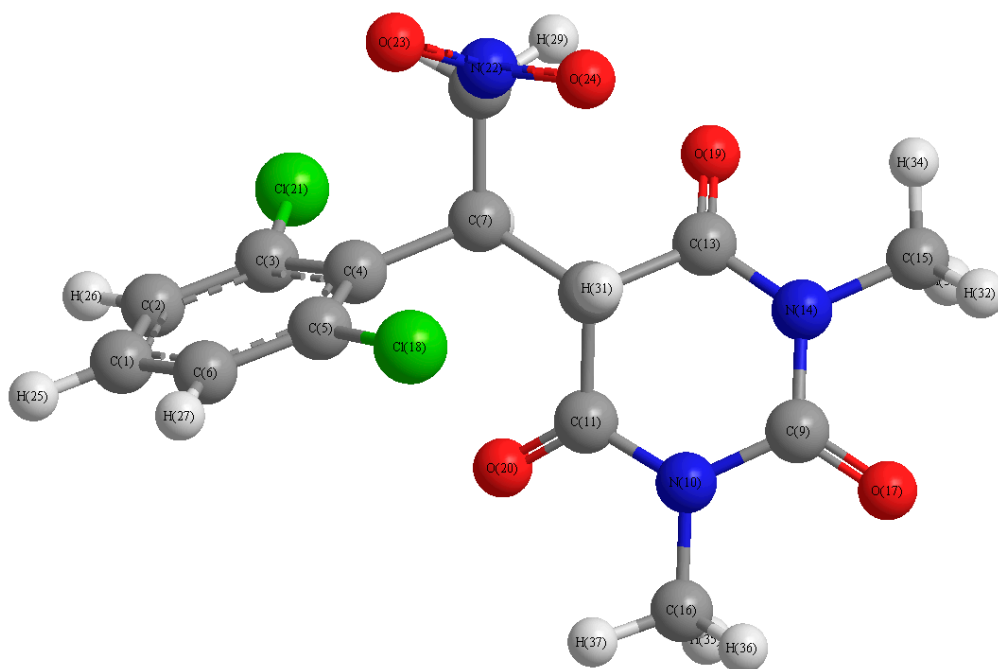

Total Energy =  $-102495.4693$  kcal/mol; Heat of Formation =  $-99.4723$  kcal/mol; Dipole = (2.064781, 2.697171,  $-1.807120$ ) 3.847562 Debye.

Figure S4. DFT computed HOMO and LUMO for **2a**.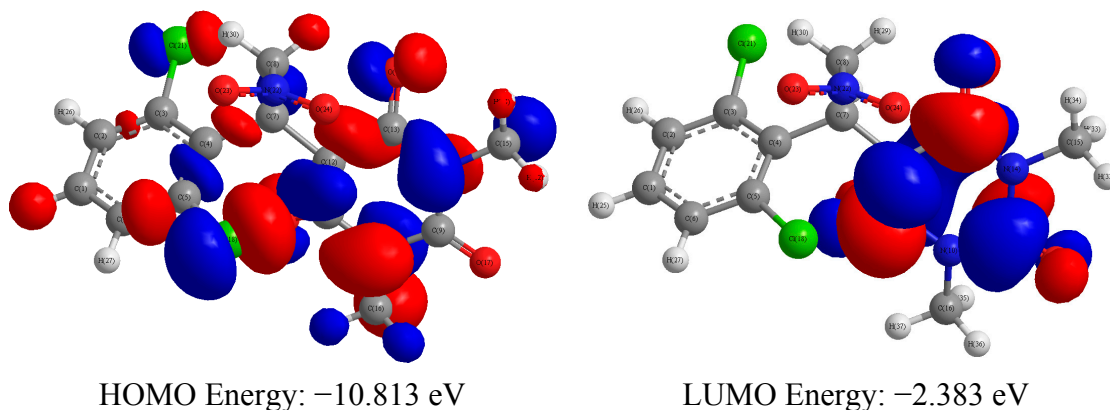Table S3. Experimental bond lengths, angles for **2a**.

| Atom   | Bond Atom | Bond Length | Angle Atom | Angle    | Second Angle Atom | Second angle | Second Angle Type |
|--------|-----------|-------------|------------|----------|-------------------|--------------|-------------------|
| C(1)   |           |             |            |          |                   |              |                   |
| C(2)   | C(1)      | 1.3864      |            |          |                   |              |                   |
| C(3)   | C(2)      | 1.4015      | C(1)       | 120.3522 |                   |              |                   |
| C(4)   | C(3)      | 1.4217      | C(2)       | 122.0382 | C(1)              | 0.5221       | Dihedral          |
| C(5)   | C(4)      | 1.4132      | C(3)       | 116.0374 | C(2)              | -1.3476      | Dihedral          |
| C(6)   | C(1)      | 1.3884      | C(2)       | 119.1574 | C(3)              | 0.4247       | Dihedral          |
| C(7)   | C(4)      | 1.5485      | C(3)       | 119.1318 | C(5)              | 124.8191     | Pro-R             |
| C(12)  | C(7)      | 1.5634      | C(4)       | 118.9024 | C(3)              | -139.7495    | Dihedral          |
| C(11)  | C(12)     | 1.5128      | C(7)       | 113.9543 | C(4)              | 47.2869      | Dihedral          |
| C(13)  | C(12)     | 1.5123      | C(7)       | 113.2727 | C(11)             | 106.6992     | Pro-S             |
| N(10)  | C(11)     | 1.3874      | C(12)      | 113.0421 | C(7)              | 178.0394     | Dihedral          |
| C(9)   | N(10)     | 1.3915      | C(11)      | 122.8908 | C(12)             | -32.2783     | Dihedral          |
| N(14)  | C(13)     | 1.3862      | C(12)      | 113.3505 | C(7)              | -177.7159    | Dihedral          |
| Cl(18) | C(5)      | 1.7277      | C(4)       | 124.0885 | C(6)              | 114.4806     | Pro-R             |
| Cl(21) | C(3)      | 1.7365      | C(2)       | 115.2511 | C(4)              | 122.7008     | Pro-R             |
| C(15)  | N(14)     | 1.4517      | C(9)       | 117.0650 | C(13)             | 117.5998     | Pro-R             |
| C(16)  | N(10)     | 1.4516      | C(9)       | 117.0067 | C(11)             | 117.4565     | Pro-S             |
| C(8)   | C(7)      | 1.5498      | C(4)       | 109.1372 | C(12)             | 115.7561     | Pro-R             |
| O(17)  | C(9)      | 1.2323      | N(10)      | 121.7606 | N(14)             | 121.7552     | Pro-R             |
| O(19)  | C(13)     | 1.2279      | C(12)      | 123.0484 | N(14)             | 123.5988     | Pro-R             |
| O(20)  | C(11)     | 1.2275      | N(10)      | 123.3054 | C(12)             | 123.6516     | Pro-R             |
| N(22)  | C(8)      | 1.4968      | C(7)       | 111.7613 | C(4)              | 77.9778      | Dihedral          |
| O(23)  | N(22)     | 1.2363      | C(8)       | 117.2469 | C(7)              | -101.8952    | Dihedral          |
| O(24)  | N(22)     | 1.2377      | C(8)       | 116.9998 | O(23)             | 125.7525     | Pro-R             |
| H(25)  | C(1)      | 1.0868      | C(2)       | 120.4529 | C(6)              | 120.3881     | Pro-S             |
| H(26)  | C(2)      | 1.0881      | C(1)       | 119.2359 | C(3)              | 120.4115     | Pro-R             |
| H(27)  | C(6)      | 1.0889      | C(1)       | 118.8242 | C(5)              | 120.2011     | Pro-S             |
| H(31)  | C(12)     | 1.0927      | C(7)       | 110.2297 | C(11)             | 106.9205     | Pro-R             |
| H(28)  | C(7)      | 1.0980      | C(4)       | 105.1256 | C(8)              | 104.4393     | Pro-R             |
| H(29)  | C(8)      | 1.0922      | C(7)       | 113.5886 | N(22)             | 105.8185     | Pro-S             |
| H(30)  | C(8)      | 1.0963      | C(7)       | 112.1473 | N(22)             | 106.4889     | Pro-R             |
| H(32)  | C(15)     | 1.0943      | N(14)      | 110.3782 | C(9)              | -44.3751     | Dihedral          |
| H(33)  | C(15)     | 1.0948      | N(14)      | 108.6067 | H(32)             | 108.9451     | Pro-S             |
| H(34)  | C(15)     | 1.0941      | N(14)      | 110.8285 | H(32)             | 108.9144     | Pro-R             |
| H(35)  | C(16)     | 1.0948      | N(10)      | 108.6479 | C(9)              | -74.7931     | Dihedral          |
| H(36)  | C(16)     | 1.0942      | N(10)      | 110.3827 | H(35)             | 108.9658     | Pro-S             |
| H(37)  | C(16)     | 1.0942      | N(10)      | 110.7622 | H(35)             | 109.1393     | Pro-R             |

**Table S4.** Experimental transmittance and wavenumber for **2a**.

| <b>Transmittance (%)</b> | <b>Wavenumbers</b> |
|--------------------------|--------------------|
| 99.98                    | 5.9800             |
| 100.00                   | 7.7300             |
| 99.98                    | 11.0900            |
| 99.96                    | 13.5700            |
| 100.00                   | 17.2900            |
| 99.79                    | 19.1400            |
| 99.72                    | 27.8200            |
| 99.75                    | 31.5900            |
| 99.49                    | 34.2100            |
| 99.72                    | 46.5400            |
| 99.95                    | 46.7100            |
| 97.59                    | 50.1100            |
| 99.64                    | 65.3300            |
| 95.75                    | 68.4300            |
| 99.84                    | 81.0600            |
| 99.93                    | 90.5300            |
| 99.19                    | 101.1700           |
| 99.65                    | 118.9400           |
| 99.04                    | 156.3700           |
| 98.27                    | 166.8700           |
| 99.99                    | 181.6700           |
| 99.81                    | 184.3600           |
| 98.59                    | 193.7700           |
| 98.52                    | 200.6100           |
| 99.11                    | 250.5400           |
| 98.27                    | 275.8700           |
| 99.63                    | 286.2400           |
| 94.83                    | 344.8000           |
| 95.99                    | 367.8200           |
| 93.17                    | 373.7400           |
| 99.32                    | 379.4600           |
| 98.47                    | 394.2000           |
| 99.29                    | 407.2600           |
| 97.50                    | 409.1400           |
| 97.46                    | 432.6800           |
| 96.21                    | 461.5700           |
| 90.52                    | 471.2400           |
| 99.08                    | 491.7600           |
| 84.97                    | 523.9700           |
| 99.62                    | 535.1000           |
| 91.62                    | 591.7700           |
| 96.39                    | 604.7200           |
| 84.17                    | 611.3800           |
| 47.99                    | 629.4200           |

**Table S4. Cont.**

| <b>Transmittance (%)</b> | <b>Wavenumbers</b> |
|--------------------------|--------------------|
| 97.84                    | 633.5200           |
| 99.23                    | 662.4500           |
| 85.66                    | 688.7100           |
| 71.88                    | 737.3900           |
| 96.39                    | 761.2300           |
| 49.43                    | 787.5100           |
| 86.57                    | 818.4100           |
| 92.18                    | 840.6400           |
| 95.78                    | 861.5100           |
| 85.35                    | 891.0800           |
| 99.95                    | 932.8400           |
| 87.04                    | 935.3500           |
| 82.81                    | 948.4000           |
| 85.78                    | 963.1200           |
| 99.26                    | 985.5100           |
| 99.29                    | 992.5100           |
| 98.82                    | 1012.7700          |
| 92.46                    | 1024.6000          |
| 95.70                    | 1032.0800          |
| 90.42                    | 1047.2900          |
| 98.60                    | 1057.2100          |
| 97.48                    | 1083.7900          |
| 89.61                    | 1099.5500          |
| 66.34                    | 1128.1300          |
| 81.74                    | 1142.1900          |
| 85.35                    | 1172.0400          |
| 78.91                    | 1175.5100          |
| 98.26                    | 1183.4700          |
| 80.45                    | 1200.0600          |
| 86.40                    | 1216.2400          |
| 86.05                    | 1252.2900          |
| 88.30                    | 1274.6800          |
| 71.39                    | 1281.6100          |
| 79.38                    | 1293.0800          |
| 87.16                    | 1324.4000          |
| 57.39                    | 1332.4800          |
| 71.41                    | 1348.6900          |
| 84.12                    | 1361.6200          |
| 85.29                    | 1365.6000          |
| 45.97                    | 1372.3200          |
| 91.32                    | 1373.7200          |
| 96.96                    | 1379.7800          |
| 88.34                    | 1385.6200          |
| 89.95                    | 1396.8900          |
| 91.71                    | 1403.3000          |

Table S4. *Cont.*

| Transmittance (%) | Wavenumbers |
|-------------------|-------------|
| 94.35             | 1514.8300   |
| 95.58             | 1581.8300   |
| 67.64             | 1604.3400   |
| 99.32             | 1760.8000   |
| 96.00             | 1781.9300   |
| 0.00              | 1894.6100   |
| 96.35             | 1899.8500   |
| 90.43             | 1929.9300   |
| 95.28             | 1971.2700   |
| 98.66             | 2785.9600   |
| 99.97             | 2808.9400   |
| 99.45             | 2888.3300   |
| 99.48             | 2972.5400   |
| 99.33             | 3036.0600   |
| 98.86             | 3050.0200   |
| 99.54             | 3051.6700   |
| 99.05             | 3059.3500   |
| 98.98             | 3064.7200   |
| 99.30             | 3064.9600   |
| 99.16             | 3069.1800   |
| 99.93             | 3130.1100   |
| 99.96             | 3141.1500   |

Figure S5. DFT optimized structure of **2b** along with computed data.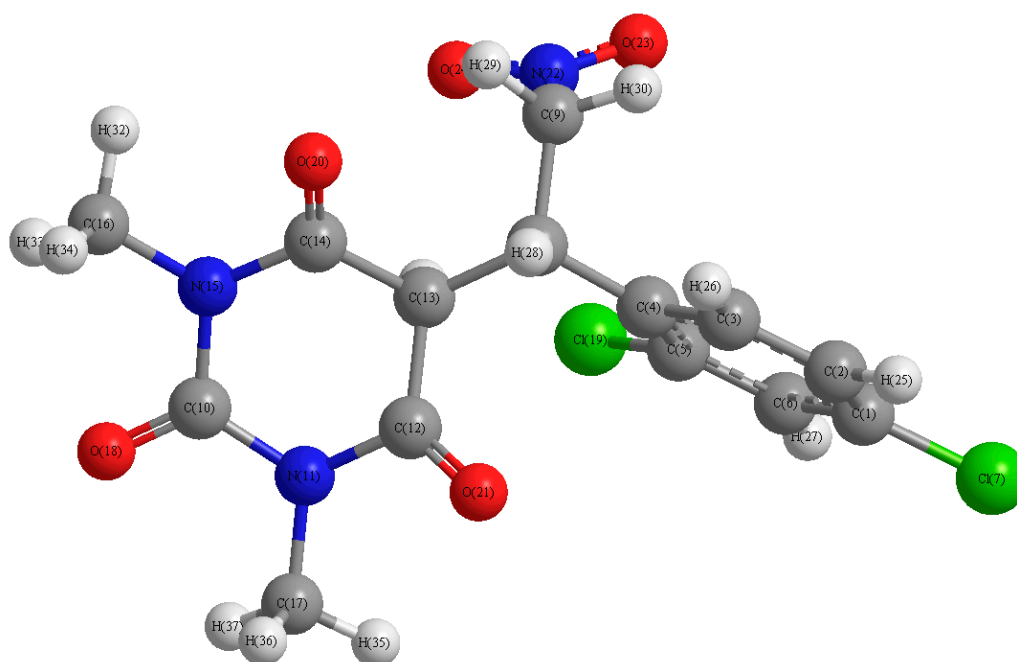

Total Energy = -1244859.4433 kcal/mol; Heat of Formation = -100.9025 kcal/mol; Dipole = (0.034664, 1.212610, -3.933575) 4.116386 Debye.

Figure S6. DFT computed HOMO and LUMO for **2b**.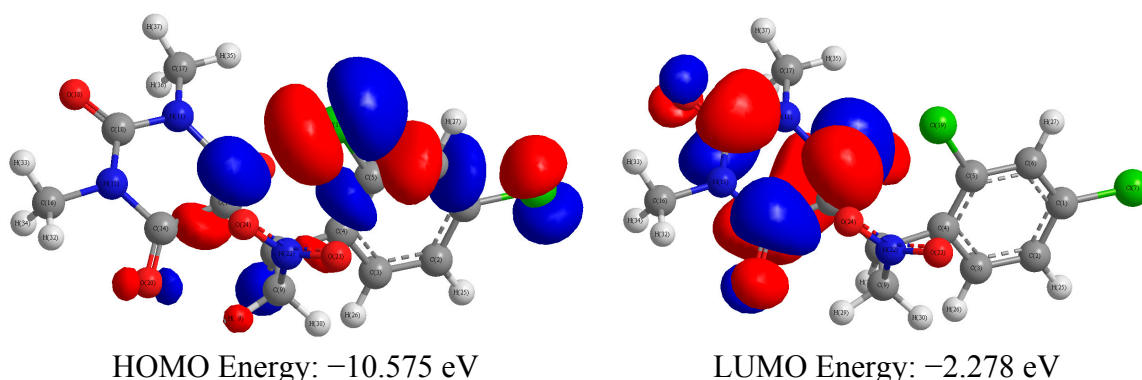Table S5. Experimental bond lengths, angles for **2b**.

| Atom   | Bond Atom | Bond Length | Angle Atom | Angle    | Second Angle Atom | Second angle | Second Angle Type |
|--------|-----------|-------------|------------|----------|-------------------|--------------|-------------------|
| C(1)   |           |             |            |          |                   |              |                   |
| C(2)   | C(1)      | 1.3873      |            |          |                   |              |                   |
| C(3)   | C(2)      | 1.3967      | C(1)       | 119.6476 |                   |              |                   |
| C(4)   | C(3)      | 1.4153      | C(2)       | 121.7288 | C(1)              | 0.2557       | Dihedral          |
| C(5)   | C(4)      | 1.4090      | C(3)       | 117.2212 | C(2)              | -0.3285      | Dihedral          |
| C(6)   | C(1)      | 1.3898      | C(2)       | 120.1762 | C(3)              | -0.0114      | Dihedral          |
| Cl(7)  | C(1)      | 1.7195      | C(2)       | 119.8773 | C(6)              | 119.9464     | Pro-S             |
| C(8)   | C(4)      | 1.5424      | C(3)       | 116.0661 | C(5)              | 126.7037     | Pro-R             |
| C(13)  | C(8)      | 1.5593      | C(4)       | 117.8002 | C(3)              | -135.9436    | Dihedral          |
| C(12)  | C(13)     | 1.5125      | C(8)       | 113.9155 | C(4)              | 50.0563      | Dihedral          |
| C(14)  | C(13)     | 1.5104      | C(8)       | 113.4334 | C(12)             | 106.5256     | Pro-S             |
| N(11)  | C(12)     | 1.3881      | C(13)      | 113.0470 | C(8)              | 177.8067     | Dihedral          |
| C(10)  | N(11)     | 1.3925      | C(12)      | 123.0628 | C(13)             | -30.7868     | Dihedral          |
| N(15)  | C(14)     | 1.3855      | C(13)      | 113.0492 | C(8)              | -179.2941    | Dihedral          |
| Cl(19) | C(5)      | 1.7247      | C(4)       | 123.7093 | C(6)              | 115.3937     | Pro-R             |
| C(16)  | N(15)     | 1.4513      | C(10)      | 117.0595 | C(14)             | 117.6528     | Pro-R             |
| C(17)  | N(11)     | 1.4515      | C(10)      | 116.9594 | C(12)             | 117.4665     | Pro-S             |
| C(9)   | C(8)      | 1.5484      | C(4)       | 109.1486 | C(13)             | 116.5427     | Pro-R             |
| O(18)  | C(10)     | 1.2325      | N(11)      | 121.7820 | N(15)             | 121.7421     | Pro-R             |
| O(20)  | C(14)     | 1.2278      | C(13)      | 123.1300 | N(15)             | 123.8208     | Pro-S             |
| O(21)  | C(12)     | 1.2276      | N(11)      | 123.3190 | C(13)             | 123.6338     | Pro-S             |
| N(22)  | C(9)      | 1.4962      | C(8)       | 112.1510 | C(4)              | 78.8856      | Dihedral          |
| O(23)  | N(22)     | 1.2362      | C(9)       | 117.2089 | C(8)              | -105.8715    | Dihedral          |
| O(24)  | N(22)     | 1.2378      | C(9)       | 117.0208 | O(23)             | 125.7643     | Pro-R             |
| H(25)  | C(2)      | 1.0872      | C(1)       | 120.5061 | C(3)              | 119.8459     | Pro-S             |
| H(26)  | C(3)      | 1.0898      | C(2)       | 117.6896 | C(4)              | 120.5779     | Pro-S             |
| H(27)  | C(6)      | 1.0876      | C(1)       | 119.5477 | C(5)              | 120.1232     | Pro-S             |
| H(31)  | C(13)     | 1.0929      | C(8)       | 110.1325 | C(12)             | 106.6973     | Pro-R             |
| H(28)  | C(8)      | 1.1026      | C(4)       | 104.3839 | C(9)              | 103.7494     | Pro-R             |
| H(29)  | C(9)      | 1.0921      | C(8)       | 113.5301 | N(22)             | 105.8036     | Pro-S             |
| H(30)  | C(9)      | 1.0968      | C(8)       | 111.6415 | N(22)             | 106.7884     | Pro-R             |
| H(32)  | C(16)     | 1.0940      | N(15)      | 110.7198 | C(10)             | -165.8870    | Dihedral          |
| H(33)  | C(16)     | 1.0943      | N(15)      | 110.2854 | H(32)             | 108.9633     | Pro-S             |
| H(34)  | C(16)     | 1.0947      | N(15)      | 108.6865 | H(32)             | 109.1871     | Pro-R             |
| H(35)  | C(17)     | 1.0942      | N(11)      | 110.8294 | C(10)             | 165.3616     | Dihedral          |
| H(36)  | C(17)     | 1.0950      | N(11)      | 108.5925 | H(35)             | 109.1156     | Pro-S             |
| H(37)  | C(17)     | 1.0943      | N(11)      | 110.4156 | H(35)             | 108.9306     | Pro-R             |



**Table S6.** Experimental transmittance and wavenumber for **2b**.

| <b>Transmittance (%)</b> | <b>Wavenumbers</b> |
|--------------------------|--------------------|
| 99.87                    | 5.1100             |
| 100.00                   | 8.4700             |
| 99.91                    | 10.5600            |
| 99.95                    | 16.3500            |
| 99.88                    | 19.5500            |
| 99.73                    | 20.0300            |
| 99.62                    | 22.7900            |
| 99.82                    | 30.7000            |
| 99.75                    | 32.8000            |
| 99.89                    | 38.8200            |
| 99.53                    | 48.2000            |
| 98.07                    | 52.4500            |
| 99.63                    | 56.7700            |
| 95.71                    | 70.4900            |
| 99.92                    | 93.5900            |
| 99.16                    | 101.1000           |
| 99.63                    | 102.7400           |
| 99.92                    | 108.6900           |
| 99.15                    | 156.0300           |
| 99.32                    | 162.0900           |
| 98.79                    | 170.7800           |
| 99.74                    | 189.2400           |
| 99.44                    | 193.5100           |
| 99.01                    | 201.2900           |
| 98.25                    | 218.5600           |
| 97.85                    | 268.9100           |
| 98.07                    | 294.9900           |
| 94.21                    | 342.1700           |
| 99.39                    | 369.2500           |
| 92.71                    | 372.4400           |
| 99.28                    | 377.5000           |
| 99.62                    | 389.4900           |
| 99.05                    | 403.2500           |
| 99.91                    | 406.6300           |
| 99.18                    | 422.2400           |
| 86.57                    | 458.4600           |
| 99.21                    | 462.6100           |
| 95.69                    | 471.3100           |
| 91.31                    | 519.9400           |
| 88.63                    | 566.4700           |
| 92.84                    | 588.6300           |
| 90.66                    | 603.8800           |
| 86.83                    | 608.4900           |
| 46.12                    | 628.1200           |
| 98.71                    | 642.1000           |

**Table S6. Cont.**

| <b>Transmittance (%)</b> | <b>Wavenumbers</b> |
|--------------------------|--------------------|
| 99.94                    | 672.3300           |
| 87.83                    | 689.3100           |
| 82.30                    | 721.5900           |
| 85.92                    | 729.5300           |
| 76.98                    | 764.6800           |
| 79.20                    | 839.5800           |
| 80.68                    | 860.1300           |
| 96.07                    | 863.7300           |
| 87.80                    | 893.1100           |
| 85.80                    | 934.9300           |
| 91.19                    | 939.8600           |
| 83.27                    | 946.2200           |
| 88.68                    | 960.2100           |
| 99.31                    | 983.7400           |
| 99.02                    | 991.5200           |
| 99.14                    | 992.9200           |
| 90.48                    | 1022.0800          |
| 95.30                    | 1031.1800          |
| 89.84                    | 1046.1900          |
| 95.31                    | 1048.7500          |
| 79.09                    | 1068.9000          |
| 98.55                    | 1090.9700          |
| 89.48                    | 1113.3900          |
| 64.89                    | 1127.9300          |
| 73.02                    | 1149.8800          |
| 81.03                    | 1175.9500          |
| 97.00                    | 1181.9300          |
| 77.17                    | 1189.9400          |
| 97.88                    | 1209.1100          |
| 86.66                    | 1242.6500          |
| 97.85                    | 1270.7600          |
| 61.91                    | 1281.7600          |
| 80.47                    | 1293.7100          |
| 95.72                    | 1319.3400          |
| 52.82                    | 1332.4600          |
| 66.66                    | 1351.0100          |
| 84.03                    | 1361.8200          |
| 85.89                    | 1365.4000          |
| 50.33                    | 1370.2600          |
| 90.41                    | 1376.5900          |
| 93.44                    | 1380.1600          |
| 90.99                    | 1394.1200          |
| 89.17                    | 1397.4900          |
| 92.78                    | 1403.2800          |
| 97.25                    | 1511.2400          |

**Table S6. Cont.**

| <b>Transmittance (%)</b> | <b>Wavenumbers</b> |
|--------------------------|--------------------|
| 94.01                    | 1583.7900          |
| 67.98                    | 1603.0600          |
| 99.01                    | 1762.6000          |
| 98.80                    | 1786.7300          |
| 100.00                   | 1894.7500          |
| 96.99                    | 1900.7300          |
| 90.44                    | 1930.2500          |
| 95.13                    | 1970.7300          |
| 98.66                    | 2783.6200          |
| 99.99                    | 2819.9200          |
| 99.52                    | 2900.0200          |
| 99.59                    | 2980.6500          |
| 97.83                    | 3037.1500          |
| 99.57                    | 3046.0600          |
| 99.62                    | 3047.3100          |
| 99.02                    | 3054.3700          |
| 99.32                    | 3058.0500          |
| 99.18                    | 3068.9500          |
| 98.69                    | 3074.5400          |
| 99.92                    | 3124.0200          |
| 99.95                    | 3138.5100          |
